# Supplementary material for: Detection of prokaryotic promoters from the genomic distribution of hexanucleotide pairs
Source: PubMed Central journal article supplement (PMC1615881; doi:10.1186/1471-2105-7-423), 2006-10-02
Supplement: 1471-2105-7-423-S2.pdf [file 1471-2105-7-423-S2.pdf]

**Additional file 2 – Detailed information on the generation of synthetic matrices**

|                         | <b>0/0</b> | <b>0/1</b> | <b>0/2</b> | <b>0/3</b> | <b>1/0</b> | <b>1/1</b> | <b>1/2</b> | <b>1/3</b> | <b>2/0</b> | <b>2/1</b> | <b>2/2</b> | <b>2/3</b> | <b>3/0</b> | <b>3/1</b> | <b>3/2</b> | <b>3/3</b> |
|-------------------------|------------|------------|------------|------------|------------|------------|------------|------------|------------|------------|------------|------------|------------|------------|------------|------------|
| <b>Minimum_value</b>    | 0.900      | 0.200      | 0.210      | 0.163      | 0.465      | 0.313      | 0.200      | 0.143      | 0.444      | 0.264      | 0.196      | 0.164      | 0.459      | 0.260      | 0.192      | 0.154      |
| <b>Maximum_value</b>    | 0.999      | 0.845      | 0.396      | 0.198      | 0.825      | 0.436      | 0.232      | 0.187      | 0.678      | 0.322      | 0.216      | 0.164      | 0.587      | 0.283      | 0.192      | 0.154      |
| <b>Step_length</b>      | 0.011      | 0.043      | 0.031      | 0.035      | 0.036      | 0.041      | 0.032      | 0.022      | 0.039      | 0.029      | 0.020      | 0.000      | 0.032      | 0.023      | 0.000      | 0.000      |
| <b>Number_of_values</b> | 10         | 16         | 7          | 2          | 11         | 4          | 2          | 3          | 7          | 3          | 2          | 1          | 5          | 2          | 1          | 1          |
