# Supplementary material for: Detection of prokaryotic promoters from the genomic distribution of hexanucleotide pairs
Source: PubMed Central journal article supplement (PMC1615881; doi:10.1186/1471-2105-7-423), 2006-10-02
Supplement: 1471-2105-7-423-S4.pdf [file 1471-2105-7-423-S4.pdf]

Additional file 4 – Three fold cross-validation results

"Training" phase

| Organism              | Promoters  | Regions    | Nt            | Spacing      | Organism-specialized matrices |             |                  | General matrix |             |
|-----------------------|------------|------------|---------------|--------------|-------------------------------|-------------|------------------|----------------|-------------|
|                       |            |            |               |              | Sensitivity                   | FP/100 nt   | Name             | Sensitivity    | FP/100 nt   |
| <b><i>E. coli</i></b> | <b>377</b> | <b>335</b> | <b>117238</b> | <b>16-20</b> | <b>42.4%</b>                  | <b>1.13</b> | <b>229794169</b> | <b>31.0%</b>   | <b>1.09</b> |
| <i>Ecoli-1_2</i>      | 252        | 252        | 87198         | 16-20        | 40.5%                         | 1.14        | 203401358        | 27.8%          | 1.11        |
| <i>Ecoli-1_3</i>      | 251        | 251        | 90404         | 16-20        | 45.8%                         | 1.17        | 203395079        | 33.9%          | 1.14        |
| <i>Ecoli-2_3</i>      | 251        | 251        | 90026         | 16-20        | 45.4%                         | 1.15        | 226912098        | 33.1%          | 1.15        |

|                           |            |            |              |              |              |             |                  |              |             |
|---------------------------|------------|------------|--------------|--------------|--------------|-------------|------------------|--------------|-------------|
| <b><i>B. subtilis</i></b> | <b>148</b> | <b>142</b> | <b>43446</b> | <b>16-20</b> | <b>56.8%</b> | <b>0.99</b> | <b>113362653</b> | <b>50.0%</b> | <b>0.93</b> |
| <i>Bsub-1_2</i>           | 99         | 99         | 32359        | 16-20        | 59.6%        | 0.85        | 173272688        | 56.6%        | 0.96        |
| <i>Bsub-1_3</i>           | 99         | 99         | 30648        | 16-20        | 55.6%        | 0.89        | 222023835        | 48.5%        | 0.96        |
| <i>Bsub-2_3</i>           | 98         | 98         | 28705        | 16-20        | 55.1%        | 0.89        | 20218415         | 46.9%        | 0.96        |

"Testing" phase

| Organism       | Promoters | Regions | Nt    | Spacing | Organism-specialized matrices |           |           | General matrix |           |
|----------------|-----------|---------|-------|---------|-------------------------------|-----------|-----------|----------------|-----------|
|                |           |         |       |         | Sensitivity                   | FP/100 nt | Name      | Sensitivity    | FP/100 nt |
| <i>Ecoli-3</i> | 125       | 125     | 46616 | 16-20   | 46.4%                         | 1.19      | 203401358 | 39.2%          | 1.17      |
| <i>Ecoli-2</i> | 126       | 126     | 43410 | 16-20   | 38.9%                         | 1.16      | 203395079 | 27.0%          | 1.12      |
| <i>Ecoli-1</i> | 126       | 126     | 43788 | 16-20   | 39.7%                         | 1.20      | 226912098 | 28.6%          | 1.11      |

|               |    |    |       |       |       |      |           |       |      |
|---------------|----|----|-------|-------|-------|------|-----------|-------|------|
| <i>Bsub-3</i> | 49 | 49 | 13497 | 16-20 | 42.9% | 0.89 | 173272688 | 38.8% | 0.96 |
| <i>Bsub-2</i> | 49 | 49 | 15208 | 16-20 | 51.0% | 0.93 | 222023835 | 55.1% | 0.96 |
| <i>Bsub-1</i> | 50 | 50 | 17151 | 16-20 | 56.0% | 0.91 | 20218415  | 58.0% | 0.96 |

Scores between specialized matrices

|                  | Name      | 229794169 |
|------------------|-----------|-----------|
| <i>Ecoli-1_2</i> | 203401358 | 504.84    |
| <i>Ecoli-1_3</i> | 203395079 | 2379.75   |
| <i>Ecoli-2_3</i> | 226912098 | 569.57    |

|                 | Name      | 113362653 |
|-----------------|-----------|-----------|
| <i>Bsub-1_2</i> | 173272688 | 106.88    |
| <i>Bsub-1_3</i> | 222023835 | 131.73    |
| <i>Bsub-2_3</i> | 20218415  | 221.35    |

Referred to the Figure 3 of the article to get an idea of the magnitude of the scores.
