# Supplementary material for: Detection of prokaryotic promoters from the genomic distribution of hexanucleotide pairs
Source: PubMed Central journal article supplement (PMC1615881; doi:10.1186/1471-2105-7-423), 2006-10-02
Supplement: 1471-2105-7-423-S6.pdf [file 1471-2105-7-423-S6.pdf]

**Additional file 6 – Comparison with normalized PSWM scoring function**

| <b>Organism</b>        | <b>Promoters</b> | <b>Organism-specialized mat.</b> |                  | <b>General matrix</b> |                  | <b>Normalized <i>E. coli</i> PSWM</b> |                  | <b>Normalized <i>B. subtilis</i> PSWM</b> |                  |
|------------------------|------------------|----------------------------------|------------------|-----------------------|------------------|---------------------------------------|------------------|-------------------------------------------|------------------|
|                        |                  | <b>Sensitivity</b>               | <b>FP/100 nt</b> | <b>Sensitivity</b>    | <b>FP/100 nt</b> | <b>Sensitivity</b>                    | <b>FP/100 nt</b> | <b>Sensitivity</b>                        | <b>FP/100 nt</b> |
| <i>E. coli</i>         | 377              | 42.4%                            | 1.13             | 31.0%                 | 1.09             | 24.1%                                 | 0.11             | 20.2%                                     | 0.09             |
| <i>B. subtilis</i>     | 148              | 56.8%                            | 0.99             | 50.0%                 | 0.93             | 38.5%                                 | 0.13             | 35.1%                                     | 0.12             |
| <i>C. glutamicum</i>   | 34               | 29.4%                            | 1.36             | 14.7%                 | 1.36             | 26.5%                                 | 0.17             | 23.5%                                     | 0.18             |
| <i>M. pneumoniae</i>   | 30               | 43.3%                            | 1.08             | 30.0%                 | 1.07             | 26.7%                                 | 0.07             | 23.3%                                     | 0.07             |
| <i>M. tuberculosis</i> | 28               | 57.1%                            | 0.74             | 50.0%                 | 0.84             | 25.0%                                 | 0.17             | 32.1%                                     | 0.17             |
| <i>S. coelicolor</i>   | 17               | 58.8%                            | 1.42             | 47.1%                 | 1.27             | 29.4%                                 | 0.21             | 29.4%                                     | 0.21             |
| <i>H. pylori</i>       | 17               | 47.1%                            | 0.53             | 35.3%                 | 0.70             | 0.0%                                  | 0.04             | 5.9%                                      | 0.06             |
| <i>C. jejuni</i>       | 14               | 42.9%                            | 0.84             | 35.7%                 | 0.77             | 7.1%                                  | 0.07             | 0.0%                                      | 0.10             |
| <i>B. japonicum</i>    | 11               | 90.9%                            | 0.73             | 90.9%                 | 0.97             | 45.5%                                 | 0.17             | 45.5%                                     | 0.19             |
| <i>S. aureus</i>       | 8                | 37.5%                            | 0.59             | 37.5%                 | 1.13             | 12.5%                                 | 0.05             | 12.5%                                     | 0.05             |
