# Supplementary material for: Detection of prokaryotic promoters from the genomic distribution of hexanucleotide pairs
Source: PubMed Central journal article supplement (PMC1615881; doi:10.1186/1471-2105-7-423), 2006-10-02
Supplement: 1471-2105-7-423-S8.pdf [file 1471-2105-7-423-S8.pdf]

**Additional file 8 – Primer sequences used for biochemical validations**

| <b>Organism</b>     | <b>Gene Name</b> | <b>Primer sequence</b> |
|---------------------|------------------|------------------------|
| <i>E. coli</i>      | <i>yfgA</i>      | TGGCTTCAGTATTCATTCGCT  |
| <i>E. coli</i>      | <i>ygfE</i>      | TATCGACGGGTTGTGCAGACA  |
| <i>E. coli</i>      | <i>secE</i>      | ATTCGCACTCATAAACCAACC  |
| <i>E. coli</i>      | <i>tag</i>       | GTTCCATACTTCCCTCGCTA   |
| <i>B. subtilis</i>  | <i>proB</i>      | AAGGCAGGTTCCGGCAGGTT   |
| <i>B. subtilis</i>  | <i>lmrA</i>      | GGGTAGCTGCCGAAAGGATTT  |
| <i>M. bovis</i> BCG | <i>rpsA</i>      | TCCTCGCTAGAGCCTATGTCG  |
